# Supplementary material for: Helically-driven granular mobility and gravity-variant scaling relations
Source: Royal Society of Chemistry journal article supplement (doi:10.1039/c9ra00399a), 2019-01-01

Craft velocity response over distance shows that transient response and oscillations are similar for experiments and simulations

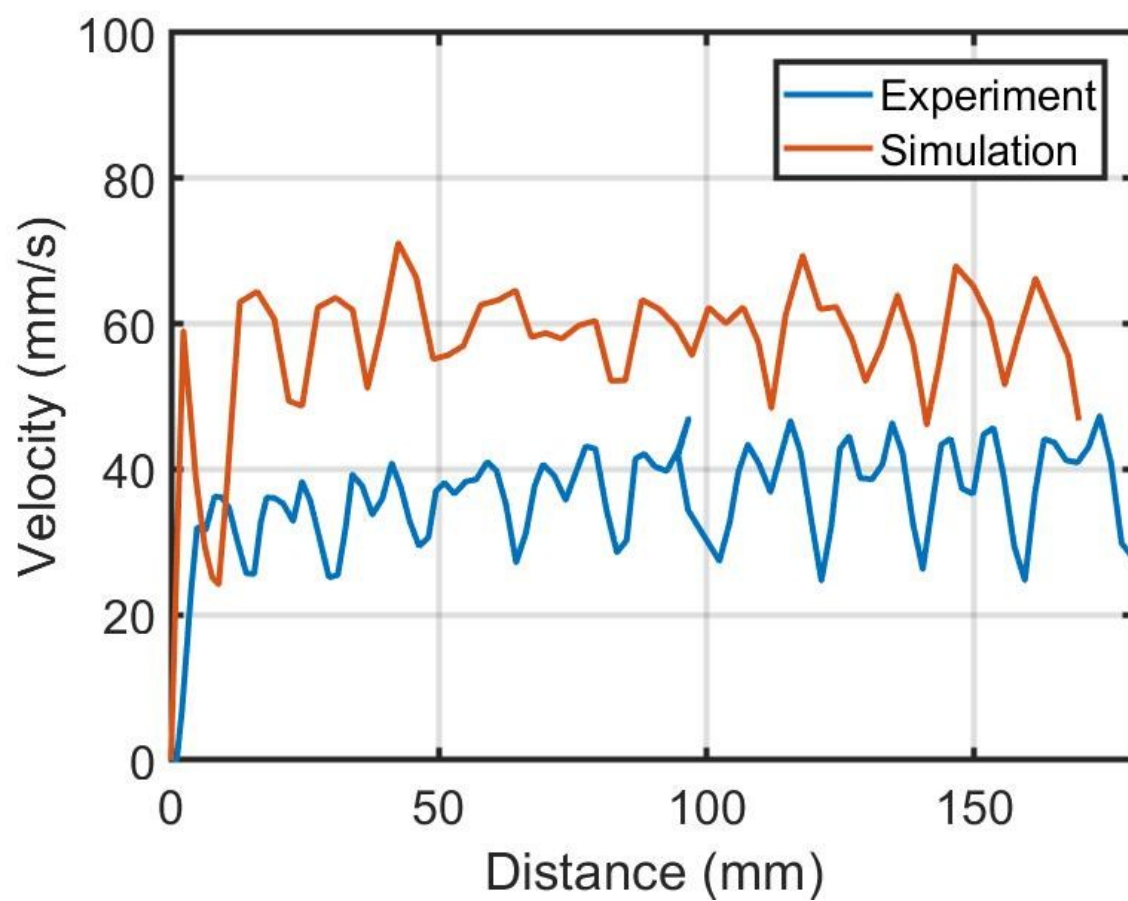

Supplement: c9ra00399a1.pdf [file c9ra00399a1.pdf]
